# Supplementary material
Source: Springer Nature journal article supplement (https://www.springerprofessional.de/resource/supplementary/13638_2011_28_MOESM1_ESM.pdf/11897314)

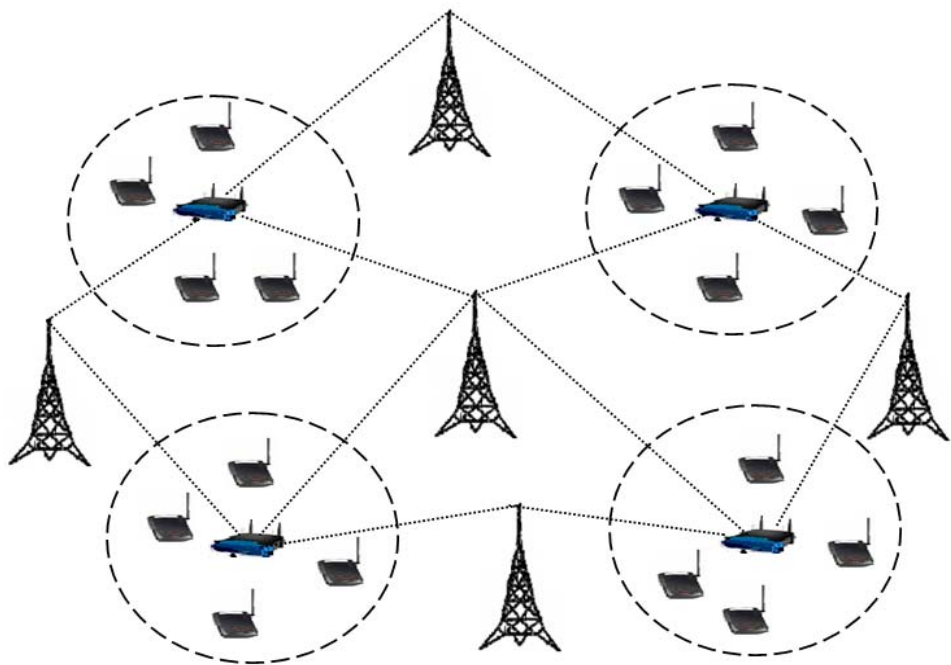

 : Mesh client     : Mesh router     : Primary user

Supplement: MOESM1 [file 11897314]
